# Supplementary material for: A New Surgical Site Infection Risk Score: Infection Risk Index in Cardiac Surgery
Source: PubMed Central journal article supplement (PMC6517895; doi:10.3390/jcm8040480), 2019-04-09
Supplement: jcm-08-00480-s001.pdf [file jcm-08-00480-s001.pdf]

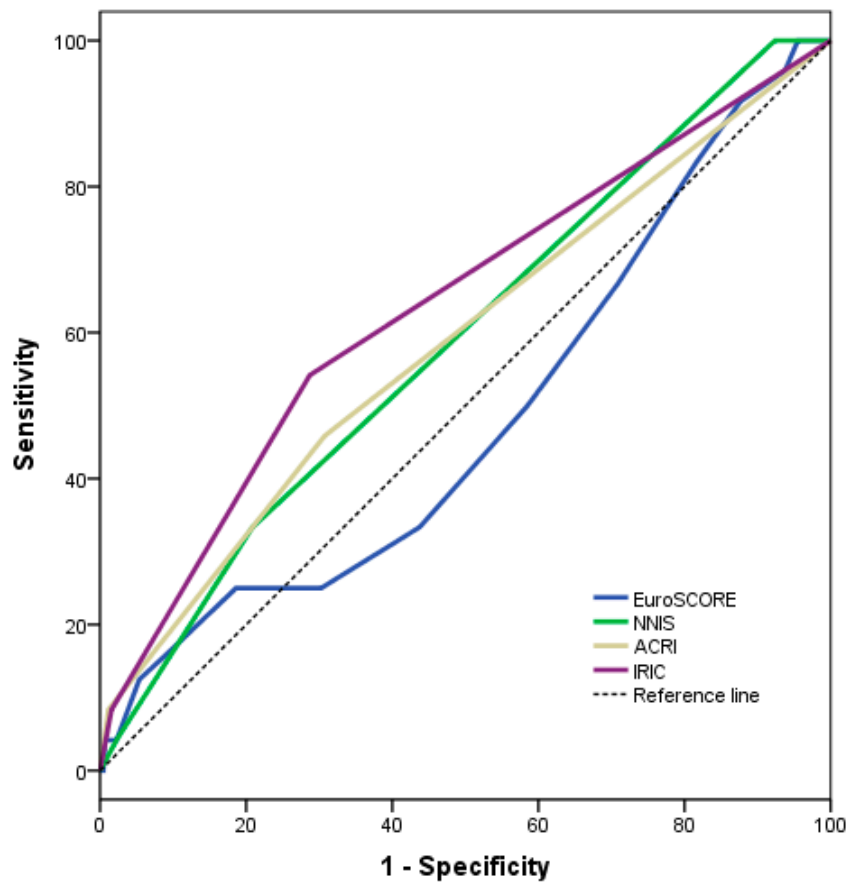

|                  | aROC  | Standard Error | p     | 95%CI       |
|------------------|-------|----------------|-------|-------------|
| <b>EuroSCORE</b> | 0.483 | 0.062          | 0.778 | 0.361–0.605 |
| <b>ACRI</b>      | 0.609 | 0.057          | 0.047 | 0.498–0.720 |
| <b>NNIS</b>      | 0.605 | 0.052          | 0.054 | 0.504–0.707 |
| <b>IRIC</b>      | 0.657 | 0.054          | 0.004 | 0.550–0.764 |

**Supplementary Figure S1.** Comparisons of aROC corresponding to IRIC, NISS, EuroSCORE and ACRI to evaluate differences between these scoring systems (test sample). ACRI, Australian Clinical Risk Index; aROC, area under the Receiver-Operating Characteristic curve; CI, confidence interval; IRIC, Infection Risk Index in Cardiac surgery; NNIS, National Nosocomial Infections Surveillance.

**Supplementary Table S1.** Patients in the training and the test sample.

|                                     | <b>Training Sample 2010–2014</b> | <b>Test Sample 2015–2017</b> | <b><i>p</i></b> |
|-------------------------------------|----------------------------------|------------------------------|-----------------|
|                                     | <i>n</i> = 1299                  | <i>n</i> = 722               |                 |
| Age in Years (mean)                 | 70.52                            | 71.13                        | 0.170           |
| Males (%)                           | 56.7                             | 59.1                         | 0.281           |
| Diabetes (%)                        | 26.6                             | 28.5                         | 0.376           |
| Obesity or >30kg/m <sup>2</sup> (%) | 5.1                              | 7.9                          | 0.015           |
| Peripheral Artery Disease (%)       | 7.2                              | 9.2                          | 0.190           |
| EuroSCORE (mean)                    | 5.86                             | 6.00                         | 0.379           |
| ASA score ≥III (%)                  | 88.1                             | 87.1                         | 0.391           |
| Clean surgery (%)                   | 91.3                             | 93.1                         | 0.111           |
| Duration of surgery in min (mean)   | 282.19                           | 239.99                       | 0.000           |
| Aortic clamping time in min (mean)  | 67.61                            | 74.63                        | 0.000           |
| Total CPB in min (mean)             | 95.96                            | 103.59                       | 0.004           |
| Reoperation for bleeding (%)        | 4.5                              | 7.3                          | 0.011           |
| Surgical Site Infection (%)         | 4.6                              | 4.0                          | 0.573           |

ASA, American Society of Anesthesiologists; CABG, coronary artery bypass graft; CARD, cardiac valve surgery; CPB, cardiopulmonary bypass.
